# Supplementary material for: In-Silico Analysis of Monoclonal Antibodies against SARS-CoV-2 Omicron
Source: MDPI journal article supplement (doi:10.3390/v14020390), 2022-02-14
Supplement: s1 [file s1]

| Table S1. The list of epitopes and paired antibodies. |                |                                                         |                     |                                                                                                                                                  |                  |           |
|-------------------------------------------------------|----------------|---------------------------------------------------------|---------------------|--------------------------------------------------------------------------------------------------------------------------------------------------|------------------|-----------|
| Group                                                 | Antibody       | Reference DOI                                           | PDB                 | Epitope                                                                                                                                          | Source           | Reference |
| NTD                                                   | Fab2-17        | 10.1016/j.chom.2021.03.005                              | 7LQW                | Q14,N17,L18,T76,K77,V143                                                                                                                         | IEDB             | [1]       |
|                                                       | COVOX-159      | 10.1016/j.cel.2021.02.032                               | 7NDD                | Q14,Y144,Y145,H146,K147,F157,G252,D253                                                                                                           | IEDB             | [2]       |
|                                                       | Fab4-8         | 10.1016/j.chom.2021.03.005                              | 7LQV                | Q14,Y144,H146,K147,N148,N149,W152,M153,E154,E156,F157,R158,R246,Y248,L249,P251,G252,D253                                                         | IEDB             | [1]       |
|                                                       | Fab5-24        | 10.1016/j.chom.2021.03.005                              | 7L2F                | Q14,C15,Y144,H146,K147,E154,E156,R158,R246,Y248,L249,T250,P251,D253,S254                                                                         | IEDB             | [1]       |
|                                                       | DH1050.1       | 10.1016/j.cel.2021.06.021                               | 7LCN                | F140,G142,V143,Y145,H146,N148,N149,W152,E154,F157,A243,L244,H245                                                                                 | IEDB             | [3]       |
|                                                       | S2X333         | 10.1016/j.cel.2021.03.028                               | 7LXY                | V16,N17,F140,G142,V143,Y144,Y145,H146,K147,N148,W152,E154,E156,R158,L244,H245,R246,L249,P251                                                     | IEDB             | [4]       |
|                                                       | S2M28          | 10.1016/j.cel.2021.03.028                               | 7LY3                | V16,N17,T20,Y144,Y145,H146,K147,N148,S155,R158,R246,L249,T250,P251,G252,D253                                                                     | IEDB             | [4]       |
|                                                       | S2L28          | 10.1016/j.cel.2021.03.028                               | 7LXZ                | V16,N17,T19,Y144,R246,S247,Y248,T250,P251,G252,D253,S254,S255,S256,G257                                                                          | IEDB             | [4]       |
|                                                       | Fab4-18        | 10.1016/j.chom.2021.03.005                              | 7L2E                | Q14,C15,V16,N17,T19,G142,V143,Y144,K147,E156,R158,L244,H245,R246,S247,Y248,L249,T250,P251,G252,S256                                              | IEDB             | [1]       |
|                                                       | CM25           | 10.1126/science.abg5268                                 | 7M8J                | Y144,Y145,H146,K147,R246,S247,Y248,L249,T250,P251,G252,S255                                                                                      | IEDB             | [5]       |
|                                                       | Fab2-51        | 10.1016/j.chom.2021.03.005                              | 7L2C                | Y144,Y145,H146,K147,N148,K150,R246,S247,Y248,L249,T250,P251,G252,D253,S254                                                                       | IEDB             | [1]       |
|                                                       | Fab1-87        | 10.1016/j.chom.2021.03.005                              | 7L2D                | Y144,Y145,H146,K147,K150,W152,H245,R246,Y248,L249,T250,P251,G252,S254,S255,S256                                                                  | IEDB             | [1]       |
|                                                       | 4A8            | 10.1126/science.abg6952                                 | 7C2L                | Y144,Y145,H146,K147,K150,W152,H245,R246,S247,Y248,L249                                                                                           | IEDB             | [6]       |
|                                                       | FC05           | 10.1038/s41422-020-00446-w                              | 7CWU                | Y144,Y145,H146,K147,K150,W152,R246,S247,Y248,L249,S256                                                                                           | IEDB             | [7]       |
|                                                       | CM17           | 10.1126/science.abg5268                                 | N/A                 | Y145,K147,W152,Y248                                                                                                                              | Reference Figure | [5]       |
|                                                       | CM30           | 10.1126/science.abg5268                                 | N/A                 | Y144,W152,R246,Y248                                                                                                                              | Reference Figure | [5]       |
|                                                       | P008_056       | 10.1126/sciadv.abg7607                                  | 7NTC                | S71,K97,S98,T124,Y145,H146,K147,K150,S151,W152,E180,G181,K182,Q183,N185,V213,H245,S247,Y248,L249,T250,A260,A262                                  | IEDB             | [8]       |
|                                                       | DH1052         | 10.1016/j.cel.2021.06.021                               | 7LAB                | A27,Y28,T29,N30,F32,N61,W64,H66,I68,H69,K97,F186,N211,L212,V213,R214,D215,L216,P217,Q218,S605,N606                                               | IEDB             | [3]       |
|                                                       | CoV2-2490      | 10.1016/j.cel.2021.05.032                               | 7DZY                | N30,F32,W64,H66,I68,K97,N185,K187,N211,V213,R214                                                                                                 | IEDB             | [9]       |
| RBD-1                                                 | CT-P59         | 10.1038/s41467-020-20602-5                              | 7CM4                | R403,K417,Y449,N450,L452,Y453,L455,F456,E484,G485,F486,Y489,F490,L492,Q493,S494,Y495,Y505                                                        | IEDB             | [10]      |
|                                                       | P5A-2G7        | 10.1038/s41422-021-00487-9                              | 7D03                | R403,K417,Y449,L452,Y453,L455,F456,E484,G485,F486,C488,Y489,F490,L492,Q493,Y505                                                                  | IEDB             | [11]      |
|                                                       | COVOX-88       | 10.1016/j.cel.2021.02.032                               | 7ND4                | R403,K417,Y453,L455,F456,E484,G485,F486,N487,C488,Y489,Q493,N501,G502,Y505                                                                       | IEDB             | [2]       |
|                                                       | S2H14          | 10.1016/j.cel.2020.09.037                               | 7JX3                | R403,V445,G446,Y449,Y453,L455,F456,N487,Y489,Q493,Y495,G496,Q498,P499,T500,N501,G502,Y505                                                        | IEDB             | [12]      |
|                                                       | C121           | 10.1038/s41586-020-2852-1                               | 7K8X,7K8Y           | G404,D405,E406,V407,R408,Q414,T415,Y449,L452,L455,A475,E484,G485,F486,Y489,F490,L492,Q493,S494,Y503,G504,Y505,Y508                               | IEDB             | [13]      |
|                                                       | C105           | 10.1016/j.cel.2020.06.025;<br>10.1038/s41586-020-2456-9 | 6XCM,6XCN           | D405,R408,T415,G416,Y421,F456,R457,K458,N460,Y473,Q474,A475,G476,F486,N487,T500,N501,G502,Y505                                                   | IEDB             | [14,15]   |
|                                                       | CC12.1         | 10.1126/science.abd2321                                 | 6XC2,6XC3           | D405,E406,T415,K417,D420,Y453,L455,F456,R457,A475,S477,F486,Y489,N487,Q493,G496,Q498,T500,N501,G502,Y505                                         | IEDB             | [16]      |
|                                                       | Ly-CoV016      | 10.1016/j.xcr.2021.100255                               | N/A                 | D405,K417,D420,L455,F456,N460,I472,Y473,A475,G476,F486,N487,Y489,G504                                                                            | Reference Figure | [17]      |
|                                                       | CV30'          | 10.1038/s41467-020-19231-9                              | 6XE1                | T415,G416,K417,D420,Y421,Y453,L455,F456,R457,K458,S459,N460,Y473,Q474,A475,G476,S477,F486,N487,Y489,Q493,S494,Y495,G496,Q498,T500,N501,G502,Y505 | IEDB             | [18]      |
|                                                       | P5A-3A1        | 10.1038/s41422-021-00487-9                              | 7D0C                | T415,G416,K417,D420,Y421,L455,F456,R457,K458,N460,Y473,Q474,A475,G476,S477,F486,N487,G496,Y505                                                   | IEDB             | [11]      |
|                                                       | SET90-C11      | 10.1016/j.celrep.2021.109433                            | 7B3O                | T415,G416,K417,D420,Y432,Y453,L455,R457,K458,N460,Y473,A475,G476,F486,N487,Y489,S494,Y495,G496,Q498,T500,N501,G502,Y504                          | IEDB             | [19]      |
|                                                       | BG1-22         | 10.1016/j.cel.2021.04.032                               | 7M6F                | T415,Y421,A475,G476,N487,S494,G502                                                                                                               | IEDB             | [20]      |
|                                                       | C105'          | 10.1038/s41467-021-24435-8                              | N/A                 | K417,D420,L455,F456,N460,Y473,A475                                                                                                               | Reference Figure | [21]      |
|                                                       | REGN10933      | 10.1126/science.abd0827                                 | 6XDG                | K417,Y453,L455,F456,E484,G485,F486,N487,C488,Y489,Q493                                                                                           | IEDB             | [22]      |
|                                                       | P5A-2F11       | 10.1038/s41422-021-00487-9                              | 7CZZ                | Y421,F456,R457,Y473,A475,G476,S477,E484,G485,F486,N487,Y489,Q493                                                                                 | IEDB             | [11]      |
|                                                       | BG7-15         | 10.1016/j.cel.2021.04.032                               | 7M6G                | N439,N440,S443,K444,V445,G446,G447,Y449,N450,S494,P499,T500,Q506                                                                                 | IEDB             | [20]      |
|                                                       | COVOX-75       | 10.1016/j.cel.2021.02.032                               | 7BEO                | N440,L441,S443,K444,V445,G446,G447,N448,Y449,N450,L452,F490,L492,Q493,S494,Y495,G496                                                             | IEDB             | [2]       |
|                                                       | C119           | 10.1038/s41586-020-2852-1                               | 7K8W                | K444,V445,G446,Y449,N450,E484,Q493,S494,Q498,G504,Y505                                                                                           | IEDB             | [13]      |
|                                                       | BD-368-2       | 10.1016/j.cel.2020.09.035                               | 7CHH,7CHF,7CHC,7CHE | K444,G446,Y449,N450,L452,N481,G482,V483,E484,G485,F490                                                                                           | IEDB             | [23]      |
|                                                       | C104           | 10.1038/s41586-020-2852-1                               | 7K8U                | R408,K444,T470,V483,F486,F490,V503,G504                                                                                                          | IEDB             | [13]      |
|                                                       | P2C-1A3        | 10.1038/s41467-020-20501-9                              | 7CDJ                | V445,G446,Y449,F456,T478,N481,V483,E484,G485,F486,N487,Y489,F490,L492,Q493,S494,Q498,T500                                                        | IEDB             | [24]      |
|                                                       | CV05-163       | 10.1126/science.abh1139                                 | 7LOP                | G446,G447,Y449,F456,T470,V483,E484,G485,F486,C488,Y489,F490,P491,L492,Q493,S494,Q498                                                             | IEDB             | [25]      |
|                                                       | P5A-1B9        | 10.1038/s41422-021-00487-9                              | 7CZX                | G446,N448,Y449,L452,E484,G485,F486,N487,Y489,F490,L492,Q493,S494                                                                                 | IEDB             | [11]      |
|                                                       | Fab2-15        | 10.1016/j.celrep.2021.108950                            | 7LSB                | G446,Y449,L452,T478,V483,E484,G485,F486,N487,Y489,F490,L492,Q493,S494,G496,Q498                                                                  | IEDB             | [26]      |
|                                                       | S2H13          | 10.1016/j.cel.2020.09.037                               | 7JV2,7JV4,7JV6      | G446,Y449,N481,G482,V483,E484,G485,F486,F490,S494                                                                                                | IEDB             | [12]      |
|                                                       | BD-23          | 10.1016/j.cel.2020.05.025                               | 7BYR                | G446,Y449,E484,G485,F486,Y489,F490,L492,Q493,S494,G496,Q498,N501,Y505                                                                            | IEDB             | [27]      |
|                                                       | CV07-250       | 10.1016/j.cel.2020.09.049                               | 6XKQ                | G446,Y449,Y453,L455,F456,A475,G476,S477,T478,G485,F486,N487,Y489,Q493,Y495,Q498,N501,Y505                                                        | IEDB             | [28]      |
|                                                       | COVA2-39       | 10.1016/j.celrep.2020.108274                            | 7JMP                | G446,Y449,F456,A475,V483,E484,G485,F486,N487,Y489,Q493                                                                                           | IEDB             | [29]      |
|                                                       | DH1041         | 10.1016/j.cel.2021.06.021                               | 7LAA                | Y449,L452,T470,E471,I472,N481,G482,V483,E484,G485,F486,F490,L492,Q493,S494                                                                       | IEDB             | [3]       |
|                                                       | Fab2-4         | 10.1038/s41586-020-2571-7                               | 6XEY                | Y449,Y453,L455,F456,E484,G485,F486,Y489,F490,L492,Q493,S494                                                                                      | IEDB             | [30]      |
|                                                       | H4             | 10.1016/j.celrep.2021.108950                            | 7L58                | Y449,L455,F456,V483,E484,G485,F486,Y489,F490,Q493,S494                                                                                           | IEDB             | [26]      |
|                                                       | COVOX-316      | 10.1016/j.cel.2021.02.032                               | 7ND7                | Y449,L455,F456,V483,E484,G485,F486,Y489,F490,L492,Q493,S494                                                                                      | IEDB             | [2]       |
|                                                       | COVOX-384      | 10.1016/j.cel.2021.02.032                               | 7ND8                | L452,L455,F456,I472,N481,G482,V483,E484,G485,F486,Y489,F490                                                                                      | IEDB             | [2]       |
|                                                       | Ly-CoV555      | 10.1016/j.xcr.2021.100255                               | N/A                 | L452,I472,V483,E484,G485,F486,F490,Q493,S494                                                                                                     | Table            | [17]      |
|                                                       | COVOX-253      | 10.1016/j.cel.2021.02.032                               | 7BEN                | L455,F456,K458,Y473,A475,G476,S477,T478,G485,F486,N487,Y489,Q493                                                                                 | IEDB             | [2]       |
|                                                       | COVOX-253H55L  | 10.1016/j.cel.2021.02.032                               | 7NDA                | L455,K458,Y473,A475,G476,S477,T478,G485,F486,N487,C488,Y489,Q493                                                                                 | IEDB             | [2]       |
|                                                       | C002'          | 10.1038/s41467-021-24435-8                              | N/A                 | L455,F456,E484,F486,F490,Q493                                                                                                                    | Reference Figure | [21]      |
|                                                       | S2E12          | 10.1126/science.abe3354                                 | 7K45,7K4N           | L455,Y473,A475,G476,S477,E484,G485,F486,N487,C488,Y489                                                                                           | IEDB             | [31]      |
|                                                       | BD-623         | 10.1038/s41422-021-00514-9                              | 7E7Y                | F456,Y473,A475,G476,S477,T478,V483,E484,G485,F486,N487,C488,Y489                                                                                 | IEDB             | [32]      |
|                                                       | COVOX-253H165L | 10.1016/j.cel.2021.02.032                               | 7NDB                | Y473,A475,T478,F486,N487                                                                                                                         | IEDB             | [2]       |
|                                                       | P5A-3C12       | 10.1038/s41422-021-00487-9                              | 7D0D                | V483,E484,F486,Y489                                                                                                                              | IEDB             | [11]      |
|                                                       | AZD8895        | 10.1038/s41564-021-00972-2                              | 7L7E                | L455,F456,A475,G476,S477,T478,P479,E484,G485,C488,F486,Y489,Q493                                                                                 | IEDB             | [33]      |

|       |                      |                              |               |                                                                                                                                                                                                         |      |      |
|-------|----------------------|------------------------------|---------------|---------------------------------------------------------------------------------------------------------------------------------------------------------------------------------------------------------|------|------|
| RBD-2 | C002                 | 10.1038/s41586-020-2852-1    | 7K8S,7<br>K8T | A372,N440,K444,V445,Y449,N450,L455,T470,E471,N481,G482,V483,E484,G485,F486,Y489,F490,Q493,S494,T500                                                                                                     | IEDB | [13] |
|       | B38-New              | 10.1038/s41467-020-19231-9   | 7BZ5          | R403,D405,E406,R408,Q409,T415,G416,K417,D420,Y421,Y449,Y453,L455,F456,R457,K458,S459,N460,Y473,Q474,A475,G476,S477,E484,F486,N487,Y489,F490,L492,Q493,S494,Y495,G496,Q498,T500,N501,G502,V503,G504,Y505 | IEDB | [18] |
|       | CB6-New              | 10.1038/s41467-020-19231-9   | 7C01          | R403,D405,E406,R408,Q409,T415,G416,K417,D420,Y421,Y449,Y453,L455,F456,R457,K458,S459,N460,Y473,Q474,A475,G476,S477,F486,N487,Y489,F490,Q493,S494,Y495,G496,Q498,T500,N501,G502,V503,Y505                | IEDB | [18] |
|       | COVOX-158            | 10.1016/j.cell.2021.02.032   | 7ND6          | R403,D405,E406,R408,Q409,T415,G416,K417,D420,Y421,Y449,Y453,L455,F456,R457,K458,N460,Y473,Q474,A475,G476,S477,F486,N487,Y489,Y495,G496,Q498,T500,N501,G502,V503,Y505                                    | IEDB | [2]  |
|       | CB6                  | 10.1038/s41586-020-2381-y    | 7C01          | R403,D405,E406,R408,Q409,T415,G416,K417,D420,Y421,L455,F456,R457,K458,N460,Y473,Q474,A475,G476,S477,F486,N487,Y489,Q493,Y495,G502,Y505                                                                  | IEDB | [34] |
|       | P2B-1A10             | 10.1038/s41422-021-00487-9   | 7CZQ          | R403,D405,E406,R408,T415,G416,K417,D420,Y421,Y449,L455,F456,R457,K458,N460,Y473,Q474,A475,G476,S477,N487,Y489,Q493,S494,G496,T500,N501,G502,V503,Y505                                                   | IEDB | [11] |
|       | P5A-1B6              | 10.1038/s41422-021-00487-9   | 7CZV          | R403,D405,R408,Q409,T415,G416,K417,Y421,Y449,Y453,L455,F456,G485,F486,N487,Y489,Q493,S494,Y495,G496,N501,Y505                                                                                           | IEDB | [11] |
|       | COVOX-150            | 10.1016/j.cell.2021.02.032   | 7ND5          | R403,D405,R408,T415,G416,K417,D420,Y421,Y453,L455,R457,K458,N460,Y473,Q474,A475,G476,S477,F486,N487,Y489,Q493,Y495,G496,Q498,T500,N501,G502,Y505                                                        | IEDB | [2]  |
|       | BD-604-New           | 10.1038/s41422-021-00514-9   | 7E8F          | R403,D405,T415,G416,K417,D420,Y421,Y453,L455,F456,R457,K458,S459,N460,Y473,A475,G476,S477,F486,N487,Y489,Q493,G496,Q498,T500,N501,G502,Y505                                                             | IEDB | [32] |
|       | BD-629               | 10.1016/j.cell.2020.09.035   | 7CH5,7<br>CHC | R403,D405,T415,G416,K417,D420,Y421,Y453,L455,F456,R457,K458,N460,Y473,Q474,A475,G476,S477,T478,F486,N487,Y489,Q493,N501,Y505                                                                            | IEDB | [23] |
|       | Ly-CoV488<br>(Ab133) | 10.1126/scitranslmed.abf1906 | 7KMH          | R403,D405,T415,G416,K417,D420,Y421,L455,F456,R457,K458,S459,N460,Y473,Q474,A475,G476,S477,F486,N487,Y489,N501,G502,Y505                                                                                 | IEDB | [35] |
|       | CC12.3               | 10.1126/science.abd2321      | 6XC4,6<br>XC7 | R403,D405,T415,G416,K417,D420,Y421,Y453,L455,F456,R457,K458,N460,Y473,A475,G476,S477,F486,N487,Y489,Y495,N501,Y505                                                                                      | IEDB | [16] |
|       | COVA2-04             | 10.1016/j.celrep.2020.108274 | 7JMO          | R403,D405,T415,G416,K417,D420,Y421,Y453,L455,F456,R457,K458,N460,Y473,A475,G476,S477,F486,N487,Y489,Q493,S494,Y495,G496,T500,N501,G502,Y505                                                             | IEDB | [29] |
|       | CC12.3-New           | 10.1126/science.abe6230      | 7KN7          | R403,T415,G416,K417,D420,Y421,Y453,L455,F456,R457,K458,N460,Y473,Q474,A475,G476,F486,N487,Y489,Y495,G496,N501,Y505                                                                                      | IEDB | [36] |
|       | 910-30               | 10.1016/j.celrep.2021.109771 | 7KS9          | R403,D405,T415,G416,K417,D420,Y421,Y453,L455,F456,R457,K458,N460,Y473,A475,G476,F486,N487,Y489,Q493,S494,Y495,G496,Q498,T500,N501,G502,Y505                                                             | IEDB | [37] |
|       | CV30                 | 10.1038/s41467-020-19231-9   | 6XE1          | R403,D405,T415,G416,K417,D420,Y421,Y453,L455,F456,R457,K458,S459,N460,Y473,Q474,A475,G476,S477,F486,N487,Y489,F490,Q493,S494,Y495,G496,Q498,T500,N501,G502,Y505                                         | IEDB | [18] |
|       | BD-508               | 10.1038/s41422-021-00514-9   | 7E86          | R403,D405,T415,G416,K417,D420,Y421,L455,F456,R457,K458,N460,Y473,A475,G476,S477,E484,F486,N487,Y489,F490,Q493,S494,G496,Q498,N501,G502,Y505                                                             | IEDB | [32] |
|       | P2B-1A1              | 10.1038/s41422-021-00487-9   | 7CZP          | R403,E406,R408,Q409,G416,K417,Y449,Y453,L455,F456,F486,N487,Y489,Q493,S494,Y495,G496,Q498,T500,N501,G502,Y505                                                                                           | IEDB | [11] |
|       | COVOX-269            | 10.1016/j.cell.2021.02.032   | 7BEM          | R403,E406,Q409,T415,G416,K417,D420,Y421,Y453,L455,F456,R457,K458,N460,Y473,Q474,A475,G476,F486,N487,Y489,Q493,S494,Y495,G496,Q498,T500,N501,G502,Y505                                                   | IEDB | [2]  |
|       | P5A-2G9              | 10.1038/s41422-021-00487-9   | 7CZT          | R403,R408,Q409,Q414,T415,G416,K417,D420,Y421,G446,Y449,F456,A475,G476,S477,F486,N487,Y489,Q493,S494,G496,Q498,N501,Y505                                                                                 | IEDB | [11] |
|       | C1A-B3               | 10.1016/j.cell.2021.03.027   | 7KFW          | R403,R408,T415,G416,K417,D420,Y421,Y453,L455,F456,R457,K458,N460,Y473,Q474,A475,G476,F486,N487,Y489,Q493,S494,Y495,G496,Q498,T500,N501,G502,Y505                                                        | IEDB | [38] |
|       | B38                  | 10.1126/science.abc2241      | 7BZ5          | R403,Q409,T415,G416,K417,D420,Y421,L455,F456,R457,K458,S459,N460,Y473,Q474,A475,G476,S477,F486,N487,Y489,F490,Q493,Y495,G496,Q498,N501,G502,Y505                                                        | IEDB | [39] |
|       | P2C-1F11             | 10.1038/s41467-020-20501-9   | 7CDI          | R403,T415,G416,K417,D420,Y421,Y453,L455,F456,R457,K458,S459,N460,Y473,Q474,A475,G476,S477,F486,N487,Y489,Q493,G502,Y505                                                                                 | IEDB | [24] |
|       | COVOX-40             | 10.1016/j.cell.2021.02.032   | 7ND3          | R403,T415,G416,K417,D420,Y421,Y453,L455,F456,R457,K458,S459,N460,Y473,Q474,A475,G476,S477,F486,N487,Y489,Y495,G496,Q498,T500,N501,G502,Y505                                                             | IEDB | [2]  |
|       | BG4-25               | 10.1016/j.cell.2021.04.032   | 7M6D          | R403,T415,G416,K417,D420,Y421,Y453,L455,F456,R457,K458,N460,Y473,Q474,A475,G476,S477,F486,N487,Y489,Q493,Y505                                                                                           | IEDB | [20] |
|       | P4A1                 | 10.1038/s41467-021-22926-2   | 7CJF          | R403,T415,G416,K417,D420,Y421,Y453,L455,F456,R457,K458,N460,Y473,Q474,A475,G476,S477,F486,N487,Y489,Q493,S494,Y495,G496,Q498,T500,N501,G502,Y505                                                        | IEDB | [40] |
|       | C1A-C2               | 10.1016/j.cell.2021.03.027   | 7KFX          | R403,T415,G416,K417,D420,Y421,Y453,L455,F456,R457,K458,N460,Y473,Q474,A475,G476,F486,N487,Y489,Q493,S494,Y495,G496,Q498,T500,N501,G502,Y505                                                             | IEDB | [38] |
|       | BD-236               | 10.1016/j.cell.2020.09.035   | 7CHB,7<br>CHE | R403,T415,G416,K417,D420,Y421,Y453,L455,F456,R457,K458,N460,Y473,A475,G476,S477,F486,N487,Y489,Q493,S494,Y495,G496,Q498,T500,N501,G502,V503,Y505                                                        | IEDB | [23] |
|       | C1A-F10              | 10.1016/j.cell.2021.03.027   | 7KFY          | R403,T415,G416,K417,D420,Y421,Y453,L455,F456,R457,K458,N460,Y473,A475,G476,S477,F486,N487,Y489,Q493,Q498,T500,N501,G502,Y505                                                                            | IEDB | [38] |
|       | C102                 | 10.1038/s41586-020-2852-1    | 7K8M          | R403,T415,G416,K417,D420,Y421,Y453,L455,F456,R457,K458,N460,Y473,A475,G476,S477,F486,N487,Y489,T500,N501,G502,Y505                                                                                      | IEDB | [13] |
|       | C1A-B12              | 10.1016/j.cell.2021.03.027   | 7KfV          | R403,T415,G416,K417,D420,Y421,Y453,L455,F456,R457,K458,N460,Y473,A475,G476,F486,N487,Y489,Q493,S494,Y495,G496,Q498,T500,N501,G502,Y505                                                                  | IEDB | [38] |
|       | BD-604               | 10.1016/j.cell.2020.09.035   | 7CH4,7<br>CHF | R403,T415,G416,K417,D420,Y421,Y453,L455,R457,K458,S459,N460,Y473,Q474,A475,G476,S477,F486,N487,Y489,Q493,Q498,T500,N501,G502,V503,Y505                                                                  | IEDB | [23] |
|       | Ly-CoV481<br>(Ab128) | 10.1126/scitranslmed.abf1906 | 7KMI          | R403,T415,G416,K417,D420,Y421,Y453,L455,R457,K458,N460,Y473,A475,G476,S477,F486,N487,Y489,Q493,S494,Y495,G496,Q498,T500,N501,G502,V503,Y505                                                             | IEDB | [35] |
|       | P5A-1B8              | 10.1038/s41422-021-00487-9   | 7D00          | R403,T415,G416,K417,D420,Y421,L455,F456,R457,N460,Y473,A475,G476,F486,N487,Y489,Q493,G496,T500,N501,G502,Y505                                                                                           | IEDB | [11] |
|       | BD-515               | 10.1038/s41422-021-00514-9   | 7E88          | R403,T415,K417,D420,Y421,L455,R457,K458,N460,Y473,Q474,A475,G476,S477,T478,F486,N487,Y489,N501,G502,Y505                                                                                                | IEDB | [32] |
| RBD-3 | S309                 | 10.1038/s41586-020-2349-y    | 6WPS,6<br>WPT | T333,N334,L335,P337,G339,E340,V341,N343,A344,T345,K346,E354,K356,R357,I358,S359,N360,C361,N440,L441,K444,R509                                                                                           | IEDB | [41] |
|       | S309-New             | 10.1016/j.cell.2020.09.037   | 7JX3          | N334,L335,P337,G339,E340,N343,A344,T345,R346,K356,R357,S359,C361,L441                                                                                                                                   | IEDB | [12] |
|       | BG10-19              | 10.1016/j.cell.2021.04.032   | 7M6E          | G339,F342,N343,T345,R346,V367,L368,S371,S373,F374,W436,N437,S438,N440,L441,K444,N448,Y449,N450,Q498                                                                                                     | IEDB | [20] |
|       | BG7-20               | 10.1016/j.cell.2021.04.032   | 7M6H          | S375,T376,K378,R408,Q409,Q414,K417,Y449,L452,L455,F456,A475,G482,E484,G485,F486,Y489,F490,L492,Q493,S494,V503,G504,Y505,Q506,Y508                                                                       | IEDB | [20] |
|       | C144                 | 10.1038/s41586-020-2852-1    | 7K90          | G339,F342,N343,V367,S371,A372,S373,F374,Y449,L455,F456,V483,E484,G485,F486,N487,Y489,F490,Q493,S494                                                                                                     | IEDB | [13] |
|       | S2M11-New            | 10.1016/j.cell.2021.03.028   | 7LY2          | F342,N343,L368,S371,A372,S373,F374,W436,L441,K444,G446,Y449,L452,L455,F456,E484,G485,F486,Y489,F490,L492,Q493,S494                                                                                      | IEDB | [4]  |
|       | S2M11                | 10.1126/science.abe3354      | 7K43          | F342,N343,L368,S371,A372,S373,W436,N440,L441                                                                                                                                                            | IEDB | [31] |
|       | CV38-142             | 10.1016/j.chom.2021.04.005   | 7LM8          | N343,A344,T345,R346,S373,W436,N437,N440,L441,S443,K444,V445,N448,N450,R509                                                                                                                              | IEDB | [42] |
|       | AZD1061              | 10.1038/s41564-021-00972-2   | 7L7D          | T345,R346,N439,N440,L441,S443,K444,V445,G446,G447,Y449,N450,L452,E484,F490,L492,Q493,S494,P499                                                                                                          | IEDB | [33] |
|       | C135                 | 10.1038/s41586-020-2852-1    | 7K8Z          | T345,R346,S438,N439,N440,L441,P499                                                                                                                                                                      | IEDB | [13] |
|       | C110                 | 10.1038/s41586-020-2852-1    | 7K8V          | T345,R346,L441,D442,N448,Y449,N450,L452,F490,S494,Q498,P499,T500,R509                                                                                                                                   | IEDB | [13] |
|       | Fab2-7               | 10.1016/j.str.2021.05.014    | 7LSS          | T345,N439,N440,S443,K444,V445,G446,G447,N448,Y449,N450,Y451,L452,T470,E484,F490,L492,Q493,S494                                                                                                          | IEDB | [43] |
|       | CV07-270             | 10.1016/j.cell.2020.09.049   | 6XKP          | R346,F347,S349,Y351,K444,G446,G447,N448,Y449,N450,Y451,L452,T470,E484,F490,L492,Q493,S494                                                                                                               | IEDB | [28] |
|       | 47D1                 | 10.1016/j.celrep.2021.109109 | 7MF1          | R346,Y351,K444,Y449,N450,L452,T470,I472,N481,G482,V483,E484,F490,L492,S494                                                                                                                              | IEDB | [44] |

|       |                   |                                                       |                        |                                                                                                                                             |                   |         |
|-------|-------------------|-------------------------------------------------------|------------------------|---------------------------------------------------------------------------------------------------------------------------------------------|-------------------|---------|
|       | Ly-CoV1404        | 10.1101/2021.04.30.442182                             | 7MMO                   | R346,N439,N440,S443,K444,V445,G446,G447,N450,Q498,P499,T500,N501,G502,Q506                                                                  | IEDB              | [45]    |
|       | REGN10987         | 10.1126/science.abd0827                               | 6XDG                   | R346,N440,L441,K444,V445,G446,N448,Y449,Q498                                                                                                | IEDB              | [22]    |
|       | P2B-2F6           | 10.1038/s41586-020-2380-z                             | 7BWJ                   | R346,K444,G446,G447,N448,Y449,N450,L452,V483,E484,G485,F490,S494                                                                            | IEDB              | [46]    |
|       | BD-368-2          | 10.1038/s41422-021-00514-9                            | 7E8F                   | R346,K444,Y449,N450,L452,I472,N481,G482,V483,E484,F490,L492                                                                                 | IEDB              | [32]    |
|       | BG1-24            | 10.1016/j.cell.2021.04.032                            | 7M6I                   | Y351,A372,S375,T376,R408,Y449,L452,T470,I472,Y473,G482,V483,E484,G485,F486,Y489,F490,L492,Q493,S494,V503,G504,Y508                          | IEDB              | [20]    |
|       | Fab1-57           | 10.1016/j.str.2021.05.014                             | 7LS9                   | Y351,K444,V445,G446,G447,N448,Y449,N450,L452,T470,E484,F490,L492,Q493,S494,Q498                                                             | IEDB              | [43]    |
|       | DH1043            | 10.1016/j.cell.2021.06.021                            | 7LJR                   | Y351,G446,Y449,N450,L452,F456,T470,T478,P479,C480,N481,G482,V483,E484,G485,F486,N487,C488,Y489,F490,P491,L492,Q493,S494                     | IEDB              | [3]     |
|       | Ly-CoV555 (Ab169) | 10.1126/scitranslmed.abf1906                          | 7KMG                   | Y351,Y449,L455,T470,N481,G482,V483,E484,G485,F486,C488,Y489,F490,L492,Q493,S494                                                             | IEDB              | [35]    |
| RBD-4 | EY6A              | 10.1016/j.cell.2021.03.055                            | 7NXB                   | S366,Y369,N370,F374,F377,C379,Y380,G381,V382,S383,P384,T385,K386,N388,L390,F392,P412,D427,D428,F429,L517                                    | IEDB              | [47]    |
|       | CR3022            | 10.1126/science.abb7269                               | 6W41,6 YLA,6Y MO       | Y369,N370,S371,A372,F374,S375,T376,F377,K378,C379,Y380,G381,V382,S383,P384,T385,K386,D389,L390,F392,D427,D428,F429,T430,F515,E516,L517,H519 | IEDB              | [48]    |
|       | S2X259            | 10.1038/s41586-021-03817-4                            | 7M7W                   | Y369,N370,S371,A372,F374,S375,T376,F377,K378,C379,Y380,V382,S383,P384,T385,G404,D405,R408,T500,N501,G502,V503,G504,Q506                     | IEDB              | [49]    |
|       | S2A4              | 10.1016/j.cell.2020.09.037                            | 7JVA,7 JVC             | Y369,N370,S371,A372,F374,S375,T376,F377,K378,C379,S383,P384,T385,R408,Q414                                                                  | IEDB              | [12]    |
|       | DH1047            | 10.1016/j.cell.2021.06.021                            | 7LD1                   | Y369,N370,S371,A372,F374,S375,T376,F377,K378,C379,S383,P384,D405,R408,Q409,Q414,T415,G416,N501,V503,G504,Y505                               | IEDB              | [3]     |
|       | COVA1-16          | 10.1016/j.chom.2021.04.005                            | 7LM8                   | Y369,N370,S371,F377,K378,C379,Y380,G381,V382,S383,P384,T385,R408,P412,G413,Q414,T415,G416,D427,D428,F429                                    | IEDB              | [42]    |
|       | C126              | 10.1016/j.celrep.2021.109604                          | N/A                    | Y369,N370,A372,F374,K378,P384                                                                                                               | Reference Results | [50]    |
|       | H11-D4            | 10.1038/s41594-020-0469-6                             | 6ZZM                   | Y369,N370,F374,S375,T376,F377,K378,C379,Y380,G381,V382,S383,P384,T385,K386,L390,R408,D428,T430,L517,L518                                    | IEDB              | [51]    |
|       | S304              | 10.1016/j.cell.2020.09.037; 10.1038/s41586-020-2349-y | 7JW0,7 JX3             | Y369,N370,F377,K378,C379,Y380,G381,V382,S383,P384,T385,K386,N388,L390,F392,P412,G413,Q414,P426,D427,D428,F429,T430,F515,L517                | IEDB              | [12,41] |
|       | COVA1-16          | 10.1016/j.immuni.2020.10.023                          | 7JMW                   | Y369,S371,F377,K378,C379,Y380,G381,V382,S383,P384,T385,R408,P412,G413,Q414,T415,G416,D427,D428,F429                                         | IEDB              | [52]    |
|       | EY6A              | 10.1038/s41594-020-0480-y                             | 6ZER,6 ZFO,6Z DG,6Z DH | Y369,S375,F377,K378,C379,Y380,G381,V382,S383,P384,T385,K386,F392,P412,G413,D427,D428,F429,L517                                              | IEDB              | [53]    |
|       | CV2-75            | 10.1016/j.celrep.2021.109353                          | 7M3I                   | F374,S375,T376,F377,K378,C379,Y380,G381,V382,S383,P384,T385,K386,R408,N437,V503,G504,Y508                                                   | IEDB              | [54]    |
|       | COVOX-45          | 10.1016/j.cell.2021.02.032                            | 7BEL                   | W353,N354,R355,K356,R357,S359,N360,N394,Y396,P426,D428,K462,P463,F464,E465,R466,I468,E516,L518,H519,A520,T523                               | IEDB              | [2]     |
|       | S2H97             | 10.1038/s41586-021-03817-4                            | 7M7W                   | W353,R355,R357,Y396,P426,D427,D428,F429,K462,P463,F464,R466,S514,E516,L518,H519,A520,P521                                                   | IEDB              | [49]    |

## References

1. Cerutti, G.; Guo, Y.; Zhou, T.; Gorman, J.; Lee, M.; Rapp, M.; Reddem, E.R.; Yu, J.; Bahna, F.; Bimela, J.; et al. Potent SARS-CoV-2 neutralizing antibodies directed against spike N-terminal domain target a single supersite. *Cell Host Microbe* **2021**, *29*, 819–833.e7, doi:10.1016/j.chom.2021.03.005.
2. Dejnirattisai, W.; Zhou, D.; Ginn, H.M.; Duyvesteyn, H.M.; Supasa, P.; Case, J.B.; Zhao, Y.; Walter, T.S.; Mentzer, A.J.; Liu, C.; et al. The antigenic anatomy of SARS-CoV-2 receptor binding domain. *Cell* **2021**, *184*, 2183–2200.e22, doi:10.1016/j.cell.2021.02.032.
3. Li, D.; Edwards, R.J.; Manne, K.; Martinez, D.R.; Schäfer, A.; Alam, S.M.; Wiehe, K.; Lu, X.; Parks, R.; Sutherland, L.L.; et al. In vitro and in vivo functions of SARS-CoV-2 infection-enhancing and neutralizing antibodies. *Cell* **2021**, *184*, 4203–4219.e32, doi:10.1016/j.cell.2021.06.021.
4. McCallum, M.; De Marco, A.; Lempp, F.A.; Tortorici, M.A.; Pinto, D.; Walls, A.C.; Beltramello, M.; Chen, A.; Liu, Z.; Zatta, F.; et al. N-terminal domain antigenic mapping reveals a site of vulnerability for SARS-CoV-2. *Cell* **2021**, *184*, 2332–2347.e16, doi:10.1016/j.cell.2021.03.028.
5. Voss, W.N.; Hou, Y.J.; Johnson, N.V.; Delidakis, G.; Kim, J.E.; Javanmardi, K.; Horton, A.P.; Bartzoka, F.; Paresi, C.J.; Tanno, Y.; et al. Prevalent, protective, and convergent IgG recognition of SARS-CoV-2 non-RBD spike epitopes. *Sci.* **2021**, *372*, 1108–1112, doi:10.1126/science.abg5268.
6. Chi, X.; Yan, R.; Zhang, J.; Zhang, G.; Zhang, Y.; Hao, M.; Zhang, Z.; Fan, P.; Dong, Y.; Yang, Y.; et al. A neutralizing human antibody binds to the N-terminal domain of the Spike protein of SARS-CoV-2. *Science* **2020**, *369*, 650–655, doi:10.1126/science.abc6952.
7. Wang, N.; Sun, Y.; Feng, R.; Wang, Y.; Guo, Y.; Zhang, L.; Deng, Y.-Q.; Wang, L.; Cui, Z.; Cao, L.; et al. Structure-based development of human antibody cocktails against SARS-CoV-2. *Cell Res.* **2021**, *31*, 101–103, doi:10.1038/s41422-020-00446-w.
8. Rosa, A.; Pye, V.E.; Graham, C.; Muir, L.; Seow, J.; Ng, K.W.; Cook, N.J.; Rees-Spear, C.; Parker, E.; dos Santos, M.S.; et al. SARS-CoV-2 can recruit a heme metabolite to evade antibody immunity. *Sci. Adv.* **2021**, *7*, eabg7607, doi:10.1126/sciadv.abg7607.

9. Liu, Y.; Soh, W.T.; Kishikawa, J.-I.; Hirose, M.; Nakayama, E.E.; Li, S.; Sasai, M.; Suzuki, T.; Tada, A.; Arakawa, A.; et al. An infectivity-enhancing site on the SARS-CoV-2 spike protein targeted by antibodies. *Cell* **2021**, *184*, 3452–3466.e18, doi:10.1016/j.cell.2021.05.032.
10. Kim, C.; Ryu, D.-K.; Lee, J.; Kim, Y.-I.; Seo, J.-M.; Kim, Y.-G.; Jeong, J.-H.; Kim, M.; Kim, J.-I.; Kim, P.; et al. A therapeutic neutralizing antibody targeting receptor binding domain of SARS-CoV-2 spike protein. *Nat. Commun.* **2021**, *12*, 1–10, doi:10.1038/s41467-020-20602-5.
11. Yan, R.; Wang, R.; Ju, B.; Yu, J.; Zhang, Y.; Liu, N.; Wang, J.; Zhang, Q.; Chen, P.; Zhou, B.; et al. Structural basis for bivalent binding and inhibition of SARS-CoV-2 infection by human potent neutralizing antibodies. *Cell Res.* **2021**, *31*, 517–525, doi:10.1038/s41422-021-00487-9.
12. Piccoli, L.; Park, Y.-J.; Tortorici, M.A.; Czudnochowski, N.; Walls, A.C.; Beltramello, M.; Silacci-Fregni, C.; Pinto, D.; Rosen, L.E.; Bowen, J.E.; et al. Mapping Neutralizing and Immunodominant Sites on the SARS-CoV-2 Spike Receptor-Binding Domain by Structure-Guided High-Resolution Serology. *Cell* **2020**, *183*, 1024–1042.e21, doi:10.1016/j.cell.2020.09.037.
13. Barnes, C.O.; Jette, C.A.; Abernathy, M.E.; Dam, K.-M.A.; Esswein, S.R.; Gristick, H.B.; Malyutin, A.G.; Sharaf, N.G.; Huey-Tubman, K.E.; Lee, Y.E.; et al. SARS-CoV-2 neutralizing antibody structures inform therapeutic strategies. *Nature* **2020**, *588*, 682–687, doi:10.1038/s41586-020-2852-1.
14. Barnes, C.O.; West, A.P., Jr.; Huey-Tubman, K.E.; Hoffmann, M.A.G.; Sharaf, N.G.; Hoffman, P.R.; Koranda, N.; Gristick, H.B.; Gaebler, C.; Muecksch, F.; et al. Structures of Human Antibodies Bound to SARS-CoV-2 Spike Reveal Common Epitopes and Recurrent Features of Antibodies. *Cell* **2020**, *182*, 828–842, doi:10.1016/j.cell.2020.06.025.
15. Robbiani, D.F.; Gaebler, C.; Muecksch, F.; Lorenzi, J.C.C.; Wang, Z.; Cho, A.; Agudelo, M.; Barnes, C.O.; Gazumyan, A.; Finkin, S.; et al. Convergent antibody responses to SARS-CoV-2 in convalescent individuals. *Nature* **2020**, *584*, 437–442, doi:10.1038/s41586-020-2456-9.
16. Yuan, M.; Liu, H.; Wu, N.C.; Lee, C.-C.D.; Zhu, X.; Zhao, F.; Huang, D.; Yu, W.; Hua, Y.; Tien, H.; et al. Structural basis of a shared antibody response to SARS-CoV-2. *Sci.* **2020**, *369*, 1119–1123, doi:10.1126/science.abd2321.
17. Starr, T.N.; Greaney, A.J.; Dingens, A.S.; Bloom, J.D. Complete map of SARS-CoV-2 RBD mutations that escape the monoclonal antibody LY-CoV555 and its cocktail with LY-CoV016. *Cell Rep. Med.* **2021**, *2*, 100255, doi:10.1016/j.xcrm.2021.100255.
18. Hurlburt, N.K.; Seydoux, E.; Wan, Y.-H.; Edara, V.V.; Stuart, A.B.; Feng, J.; Suthar, M.S.; McGuire, A.T.; Stamatos, L.; Pancera, M. Structural basis for potent neutralization of SARS-CoV-2 and role of antibody affinity maturation. *Nat. Commun.* **2020**, *11*, 1–7, doi:10.1038/s41467-020-19231-9.
19. Bertoglio, F.; Fühner, V.; Ruschig, M.; Heine, P.A.; Abassi, L.; Klünemann, T.; Rand, U.; Meier, D.; Langreder, N.; Steinke, S.; et al. A SARS-CoV-2 neutralizing antibody selected from COVID-19 patients binds to the ACE2-RBD interface and is tolerant to most known RBD mutations. *Cell Rep.* **2021**, *36*, 109433, doi:10.1016/j.celrep.2021.109433.
20. Scheid, J.F.; Barnes, C.O.; Eraslan, B.; Hudak, A.; Keeffe, J.R.; Cosimi, L.A.; Brown, E.M.; Muecksch, F.; Weisblum, Y.; Zhang, S.; et al. B cell genomics behind cross-neutralization of SARS-CoV-2 variants and SARS-CoV. *Cell* **2021**, *184*, 3205–3221.e24, doi:10.1016/j.cell.2021.04.032.
21. Greaney, A.J.; Starr, T.N.; Barnes, C.O.; Weisblum, Y.; Schmidt, F.; Caskey, M.; Gaebler, C.; Cho, A.; Agudelo, M.; Finkin, S.; et al. Mapping mutations to the SARS-CoV-2 RBD that escape binding by different classes of antibodies. *Nat. Commun.* **2021**, *12*, 1–14, doi:10.1038/s41467-021-24435-8.
22. Hansen, J.; Baum, A.; Pascal, K.E.; Russo, V.; Giordano, S.; Wloga, E.; Fulton, B.O.; Yan, Y.; Koon, K.; Patel, K.; et al. Studies in humanized mice and convalescent humans yield a SARS-CoV-2 antibody cocktail. *Science* **2020**, *369*, 1010–1014, doi:10.1126/science.abd0827.
23. Du, S.; Cao, Y.; Zhu, Q.; Yu, P.; Qi, F.; Wang, G.; Du, X.; Bao, L.; Deng, W.; Zhu, H.; et al. Structurally Resolved SARS-CoV-2 Antibody Shows High Efficacy in Severely Infected Hamsters and Provides a Potent Cocktail Pairing Strategy. *Cell* **2020**, *183*, 1013–1023.e13, doi:10.1016/j.cell.2020.09.035.

24. Ge, J.; Wang, R.; Ju, B.; Zhang, Q.; Sun, J.; Chen, P.; Zhang, S.; Tian, Y.; Shan, S.; Cheng, L.; et al. Antibody neutralization of SARS-CoV-2 through ACE2 receptor mimicry. *Nat. Commun.* **2021**, *12*, 1–9, doi:10.1038/s41467-020-20501-9.
25. Yuan, M.; Huang, D.; Lee, C.-C.D.; Wu, N.C.; Jackson, A.M.; Zhu, X.; Liu, H.; Peng, L.; van Gils, M.J.; Sanders, R.W.; et al. Structural and functional ramifications of antigenic drift in recent SARS-CoV-2 variants. *Sci.* **2021**, *373*, 818–823, doi:10.1126/science.abh1139.
26. Rapp, M.; Guo, Y.; Reddem, E.R.; Yu, J.; Liu, L.; Wang, P.; Cerutti, G.; Katsamba, P.; Bimela, J.S.; Bahna, F.A.; et al. Modular basis for potent SARS-CoV-2 neutralization by a prevalent VH1-2-derived antibody class. *Cell Rep.* **2021**, *35*, 108950, doi:10.1016/j.celrep.2021.108950.
27. Cao, Y.; Su, B.; Guo, X.; Sun, W.; Deng, Y.; Bao, L.; Zhu, Q.; Zhang, X.; Zheng, Y.; Geng, C.; et al. Potent Neutralizing Antibodies against SARS-CoV-2 Identified by High-Throughput Single-Cell Sequencing of Convalescent Patients' B Cells. *Cell* **2020**, *182*, 73–84.e16, doi:10.1016/j.cell.2020.05.025.
28. Kreye, J.; Reincke, S.M.; Kornau, H.-C.; Sánchez-Sendin, E.; Corman, V.M.; Liu, H.; Yuan, M.; Wu, N.C.; Zhu, X.; Lee, C.-C.D.; et al. A Therapeutic Non-self-reactive SARS-CoV-2 Antibody Protects from Lung Pathology in a COVID-19 Hamster Model. *Cell* **2020**, *183*, 1058–1069.e19, doi:10.1016/j.cell.2020.09.049.
29. Wu, N.C.; Yuan, M.; Liu, H.; Lee, C.-C.D.; Zhu, X.; Bangaru, S.; Torres, J.L.; Caniels, T.G.; Brouwer, P.J.; van Gils, M.J.; et al. An Alternative Binding Mode of IGHV3-53 Antibodies to the SARS-CoV-2 Receptor Binding Domain. *Cell Rep.* **2020**, *33*, 108274, doi:10.1016/j.celrep.2020.108274.
30. Liu, L.; Wang, P.; Nair, M.S.; Yu, J.; Rapp, M.; Wang, Q.; Luo, Y.; Chan, J.F.; Sahi, V.; Figueroa, A.; et al. Potent neutralizing antibodies against multiple epitopes on SARS-CoV-2 spike. *Nature* **2020**, *584*, 450–456, doi:10.1038/s41586-020-2571-7.
31. Tortorici, M.A.; Beltramello, M.; Lempp, F.A.; Pinto, D.; Dang, H.V.; Rosen, L.E.; McCallum, M.; Bowen, J.; Minola, A.; Jaconi, S.; et al. Ultrapotent human antibodies protect against SARS-CoV-2 challenge via multiple mechanisms. *Sci.* **2020**, *370*, 950–957, doi:10.1126/science.abe3354.
32. Cao, Y.; Yisimayi, A.; Bai, Y.; Huang, W.; Li, X.; Zhang, Z.; Yuan, T.; An, R.; Wang, J.; Xiao, T.; et al. Humoral immune response to circulating SARS-CoV-2 variants elicited by inactivated and RBD-subunit vaccines. *Cell Res.* **2021**, *31*, 732–741, doi:10.1038/s41422-021-00514-9.
33. Dong, J.; Zost, S.J.; Greaney, A.J.; Starr, T.N.; Dingens, A.S.; Chen, E.C.; Chen, R.E.; Case, J.B.; Sutton, R.E.; Gilchuk, P.; et al. Genetic and structural basis for SARS-CoV-2 variant neutralization by a two-antibody cocktail. *Nat. Microbiol.* **2021**, *6*, 1233–1244, doi:10.1038/s41564-021-00972-2.
34. Shi, R.; Shan, C.; Duan, X.; Chen, Z.; Liu, P.; Song, J.; Song, T.; Bi, X.; Han, C.; Wu, L.; et al. A human neutralizing antibody targets the receptor-binding site of SARS-CoV-2. *Nature* **2020**, *584*, 120–124, doi:10.1038/s41586-020-2381-y.
35. Jones, B.E.; Brown-Augsburger, P.L.; Corbett, K.S.; Westendorf, K.; Davies, J.; Cujec, T.P.; Wiethoff, C.M.; Blackburn, J.L.; Heinz, B.A.; Foster, D.; et al. The neutralizing antibody, LY-CoV555, protects against SARS-CoV-2 infection in nonhuman primates. *Sci. Transl. Med.* **2021**, *13*, doi:10.1126/scitranslmed.abf1906.
36. Koenig, P.-A.; Das, H.; Liu, H.; Kümmerer, B.M.; Gohr, F.N.; Jenster, L.-M.; Schiffelers, L.D.J.; Tesfamariam, Y.M.; Uchima, M.; Wuerth, J.D.; et al. Structure-guided multivalent nanobodies block SARS-CoV-2 infection and suppress mutational escape. *Sci.* **2021**, *371*, doi:10.1126/science.abe6230.
37. Banach, B.B.; Cerutti, G.; Fahad, A.S.; Shen, C.-H.; De Souza, M.O.; Katsamba, P.S.; Tsybovsky, Y.; Wang, P.; Nair, M.S.; Huang, Y.; et al. Paired heavy- and light-chain signatures contribute to potent SARS-CoV-2 neutralization in public antibody responses. *Cell Rep.* **2021**, *37*, 109771, doi:10.1016/j.celrep.2021.109771.
38. Clark, S.A.; Clark, L.E.; Pan, J.; Coscia, A.; McKay, L.G.; Shankar, S.; Johnson, R.I.; Brusica, V.; Choudhary, M.C.; Regan, J.; et al. SARS-CoV-2 evolution in an immunocompromised host reveals shared neutralization escape mechanisms. *Cell* **2021**, *184*, 2605–2617.e18, doi:10.1016/j.cell.2021.03.027.
39. Wu, Y.; Wang, F.; Shen, C.; Peng, W.; Li, D.; Zhao, C.; Li, Z.; Li, S.; Bi, Y.; Yang, Y.; et al. A noncompeting pair of human neutralizing antibodies block COVID-19 virus binding to its receptor ACE2. *Sci.* **2020**, *368*, 1274–1278, doi:10.1126/science.abc2241.

40. Guo, Y.; Huang, L.; Zhang, G.; Yao, Y.; Zhou, H.; Shen, S.; Shen, B.; Li, B.; Li, X.; Zhang, Q.; et al. A SARS-CoV-2 neutralizing antibody with extensive Spike binding coverage and modified for optimal therapeutic outcomes. *Nat. Commun.* **2021**, *12*, 1–11, doi:10.1038/s41467-021-22926-2.
41. Pinto, D.; Park, Y.-J.; Beltramello, M.; Walls, A.C.; Tortorici, M.A.; Bianchi, S.; Jaconi, S.; Culap, K.; Zatta, F.; De Marco, A.; et al. Cross-neutralization of SARS-CoV-2 by a human monoclonal SARS-CoV antibody. *Nat.* **2020**, *583*, 290–295, doi:10.1038/s41586-020-2349-y.
42. Liu, H.; Yuan, M.; Huang, D.; Bangaru, S.; Zhao, F.; Lee, C.-C.D.; Peng, L.; Barman, S.; Zhu, X.; Nemazee, D.; et al. A combination of cross-neutralizing antibodies synergizes to prevent SARS-CoV-2 and SARS-CoV pseudovirus infection. *Cell Host Microbe* **2021**, *29*, 806–818.e6, doi:10.1016/j.chom.2021.04.005.
43. Cerutti, G.; Rapp, M.; Guo, Y.; Bahna, F.; Bimela, J.; Reddem, E.R.; Yu, J.; Wang, P.; Liu, L.; Huang, Y.; et al. Structural basis for accommodation of emerging B.1.351 and B.1.1.7 variants by two potent SARS-CoV-2 neutralizing antibodies. *Struct.* **2021**, *29*, 655–663.e4, doi:10.1016/j.str.2021.05.014.
44. Zhou, X.; Ma, F.; Xie, J.; Yuan, M.; Li, Y.; Shaabani, N.; Zhao, F.; Huang, D.; Wu, N.C.; Lee, C.-C.D.; et al. Diverse immunoglobulin gene usage and convergent epitope targeting in neutralizing antibody responses to SARS-CoV-2. *Cell Rep.* **2021**, *35*, 109109, doi:10.1016/j.celrep.2021.109109.
45. Westendorf, K.; Wang, L.; Žentelis, S.; Foster, D.; Vaillancourt, P.; Wiggin, M.; Lovett, E.; Lee, R. van der; Hendle, J.; Pustilnik, A.; et al. LY-CoV1404 (Bebtelovimab) Potently Neutralizes SARS-CoV-2 Variants. *Biorxiv. Prepr. Serv. Biology.* **2022**, 2021.04.30.442182, doi:10.1101/2021.04.30.442182.
46. Ju, B.; Zhang, Q.; Ge, J.; Wang, R.; Sun, J.; Ge, X.; Yu, J.; Shan, S.; Zhou, B.; Song, S.; et al. Human neutralizing antibodies elicited by SARS-CoV-2 infection. *Nature* **2020**, *584*, 115–119, doi:10.1038/s41586-020-2380-z.
47. Dejnirattisai, W.; Zhou, D.; Supasa, P.; Liu, C.; Mentzer, A.J.; Ginn, H.M.; Zhao, Y.; Duyvesteyn, H.M.; Tuekprakhon, A.; Nutalai, R.; et al. Antibody evasion by the P.1 strain of SARS-CoV-2. *Cell* **2021**, *184*, 2939–2954.e9, doi:10.1016/j.cell.2021.03.055.
48. Yuan, M.; Wu, N.C.; Zhu, X.; Lee, C.-C.D.; So, R.T.Y.; Lv, H.; Mok, C.K.P.; Wilson, I.A. A highly conserved cryptic epitope in the receptor binding domains of SARS-CoV-2 and SARS-CoV. *Sci.* **2020**, *368*, 630–633, doi:10.1126/science.abb7269.
49. Tortorici, M.A.; Czudnochowski, N.; Starr, T.N.; Marzi, R.; Walls, A.C.; Zatta, F.; Bowen, J.E.; Jaconi, S.; Di Iulio, J.; Wang, Z.; et al. Broad sarbecovirus neutralization by a human monoclonal antibody. *Nat.* **2021**, *597*, 103–108, doi:10.1038/s41586-021-03817-4.
50. Chen, E.C.; Gilchuk, P.; Zost, S.J.; Suryadevara, N.; Winkler, E.S.; Cabel, C.R.; Binshtein, E.; Chen, R.E.; Sutton, R.E.; Rodriguez, J.; et al. Convergent antibody responses to the SARS-CoV-2 spike protein in convalescent and vaccinated individuals. *Cell Rep.* **2021**, *36*, 109604, doi:10.1016/j.celrep.2021.109604.
51. Huo, J.; Le Bas, A.; Ruza, R.R.; Duyvesteyn, H.M.E.; Mikolajek, H.; Malinauskas, T.; Tan, T.K.; Rijal, P.; Dumoux, M.; Ward, P.N.; et al. Neutralizing nanobodies bind SARS-CoV-2 spike RBD and block interaction with ACE2. *Nat. Struct. Mol. Biol.* **2020**, *27*, 846–854, doi:10.1038/s41594-020-0469-6.
52. Liu, H.; Wu, N.C.; Yuan, M.; Bangaru, S.; Torres, J.L.; Caniels, T.G.; van Schooten, J.; Zhu, X.; Lee, C.-C.D.; Brouwer, P.J.; et al. Cross-Neutralization of a SARS-CoV-2 Antibody to a Functionally Conserved Site Is Mediated by Avidity. *Immun.* **2020**, *53*, 1272–1280.e5, doi:10.1016/j.immuni.2020.10.023.
53. Zhou, D.; Duyvesteyn, H.M.E.; Chen, C.-P.; Huang, C.-G.; Chen, T.-H.; Shih, S.-R.; Lin, Y.-C.; Cheng, C.-Y.; Cheng, S.-H.; Huang, Y.-C.; et al. Structural basis for the neutralization of SARS-CoV-2 by an antibody from a convalescent patient. *Nat. Struct. Mol. Biol.* **2020**, *27*, 950–958, doi:10.1038/s41594-020-0480-y.
54. Jennewein, M.F.; MacCamy, A.J.; Akins, N.R.; Feng, J.; Homad, L.J.; Hurlburt, N.K.; Seydoux, E.; Wan, Y.-H.; Stuart, A.B.; Edara, V.V.; et al. Isolation and characterization of cross-neutralizing coronavirus antibodies from COVID-19+ subjects. *Cell Rep.* **2021**, *36*, 109353, doi:10.1016/j.celrep.2021.109353.
